# Supplementary material for: Unveiling the Ir single atoms as selective active species for the partial hydrogenation of butadiene by operando XAS
Source: Royal Society of Chemistry journal article supplement (doi:10.1039/d2nr00994c), 2022-01-01

## Electronic supplementary material:

### Unveiling the Ir single atoms as selective active species for the partial hydrogenation of butadiene by *operando* XAS

W. Liu<sup>1</sup>, F. Morfin<sup>2</sup>, K. Provost<sup>1</sup>, M. Bahri<sup>3</sup>, W. Baaziz<sup>3</sup>, O. Ersen<sup>3</sup>, L. Piccolo<sup>2</sup>, C. Zlotea<sup>1\*</sup>

<sup>1</sup> *Université Paris Est, Institut de Chimie et des Matériaux Paris-Est (UMR7182), CNRS, UPEC, 2-8 rue Henri Dunant, 94320 Thiais, France*

<sup>2</sup> *Univ Lyon, Université Claude Bernard - Lyon 1, CNRS, IRCELYON - UMR 5256, 2 Avenue Albert Einstein, F-69626 VILLEURBANNE CEDEX, France*

<sup>3</sup> *Université de Strasbourg, Institut de Physique et Chimie des Matériaux de Strasbourg (UMR7504), 23 rue du Loess, BP 34 67034 Strasbourg Cedex 2, France*

Table SI1. Ir content in Ir-SAC and Ir-NC, determined by ICP-OES, and N, C and H concentration in AC, and Ir-SAC, determined by CHNS.

Figure SI1. HAADF-STEM images of Ir-SAC and TEM images of Ir-NC with an average size of 1.3 nm.

Figure SI2. XANES spectra of Ir bulk (black), Ir-NC (red), Ir-SAC (blue) and IrO<sub>2</sub> (green) showing the difference in peak heights for these samples, and the parameters *a* and *b* used for the assessment of the oxidation state.

Figure SI3. EXAFS fitting of Ir-SAC before pre-treatment under He flow at 25°C (a, b) and after reaction under He flow at 25°C (c, d).

Figure SI4. XANES spectra (A), EXAFS signals (B) and related modulus of the Fourier Transform of the k<sup>2</sup>-weighed EXAFS signals (C) of the Ir-NC recorded at room temperature for the following states: initial (under air), initial under flow of H<sub>2</sub>/He, after pre-treatment under H<sub>2</sub>/He at 250 °C and after reaction at 200 °C. Examples of EXAFS fittings (D and E).

Figure SI5. Mass spectrometry monitoring of hydrocarbon reactant and products during the hydrogenation of butadiene on Ir-SAC and Ir-NC.

Figure SI6. Ex situ STEM-HAADF images of Ir-SAC as-prepared (A), after treatment under H<sub>2</sub>/Ar flow at 250 °C (B) and 400 °C (C).

Table SI1. Ir content in Ir-SAC and Ir-NC, determined by ICP-OES, and N, C and H concentration in AC, and Ir-SAC, determined by CHNS.

| Sample | ICP-OES               | CHNS                 |                      |                     |
|--------|-----------------------|----------------------|----------------------|---------------------|
|        | Metal content (wt. %) | N (wt. %)            | C (wt. %)            | H (wt. %)           |
| AC     | -                     | 0.47 ( $\pm 0.08$ )  | 78.39 ( $\pm 0.81$ ) | 0.22 ( $\pm 0.04$ ) |
| Ir-SAC | 0.99 ( $\pm 0.01$ )   | 14.07 ( $\pm 0.15$ ) | 68.97 ( $\pm 0.11$ ) | 0.43 ( $\pm 0.03$ ) |
| Ir-NC  | 3.70 ( $\pm 0.02$ )   | -                    | -                    | -                   |

Figure SI1. HAADF-STEM images of Ir-SAC and TEM images of Ir-NC with an average size of 1.3 nm.

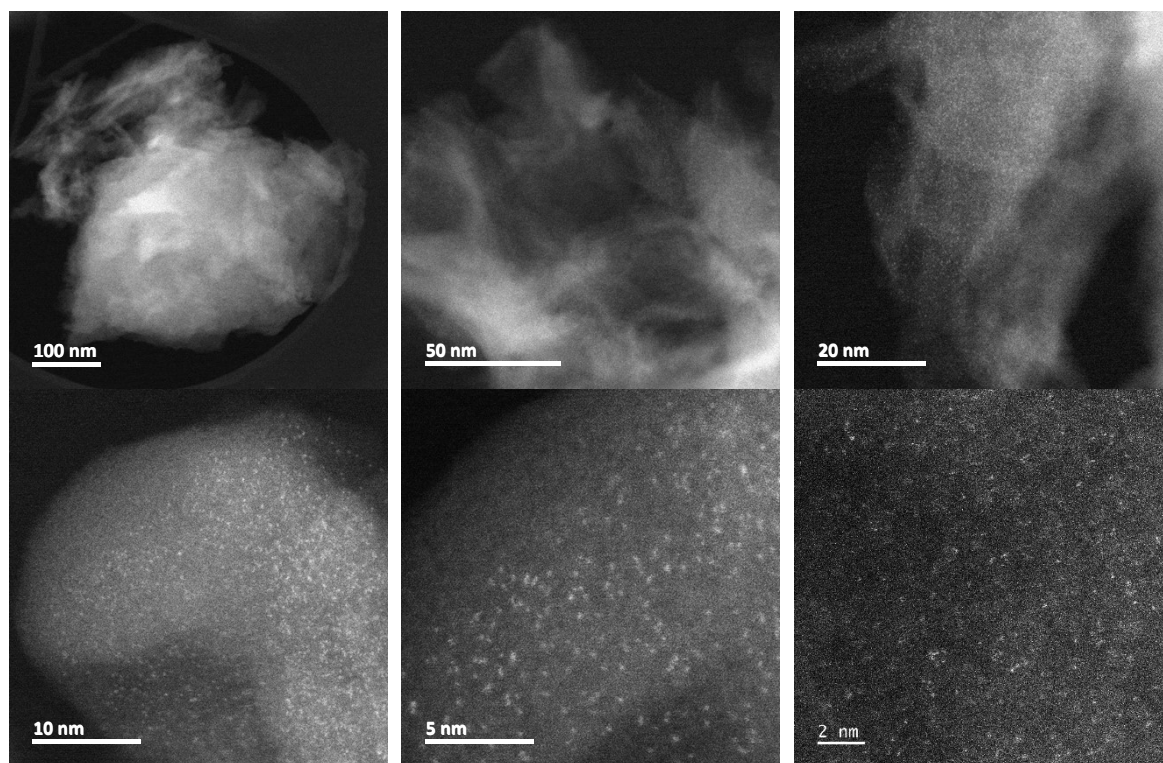

Six HAADF-STEM images of Ir-SAC. No nanoparticles could be noticed in the low magnification images.

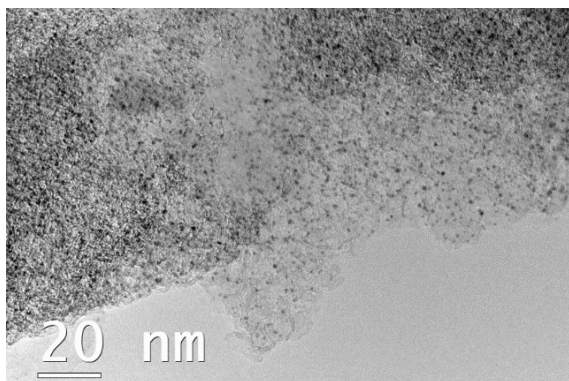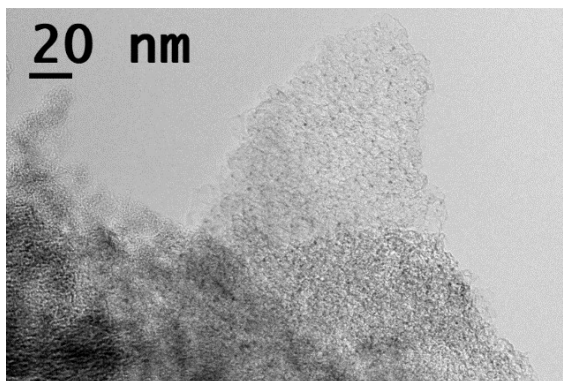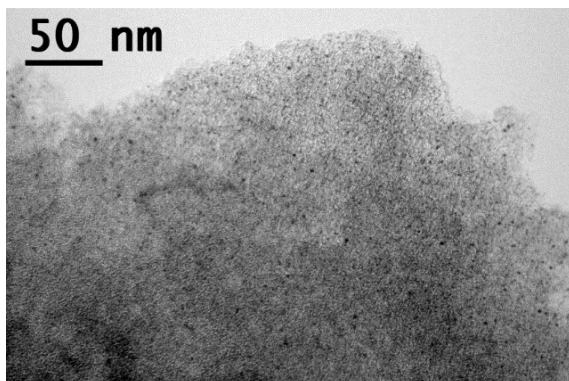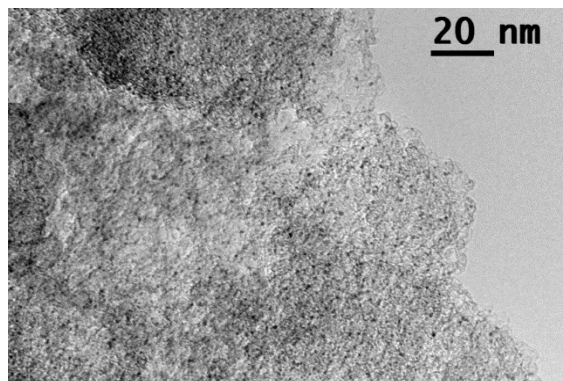

Four TEM image of Ir-NC. Well dispersed Ir nanoparticles are visible in these TEM images.

Figure SI2. XANES spectra of Ir bulk (black), Ir-NC (red), Ir-SAC (blue) and IrO<sub>2</sub> (green) showing the difference in peak heights for these samples, and the parameters  $a$  and  $b$  used for the assessment of the oxidation state.

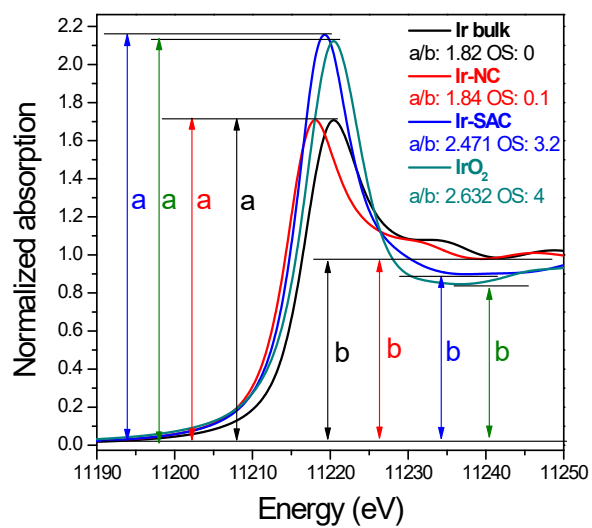

Figure SI3. EXAFS fitting of Ir-SAC before pre-treatment under He flow at 25°C (a, b) and after reaction under He flow at 25°C (c, d).

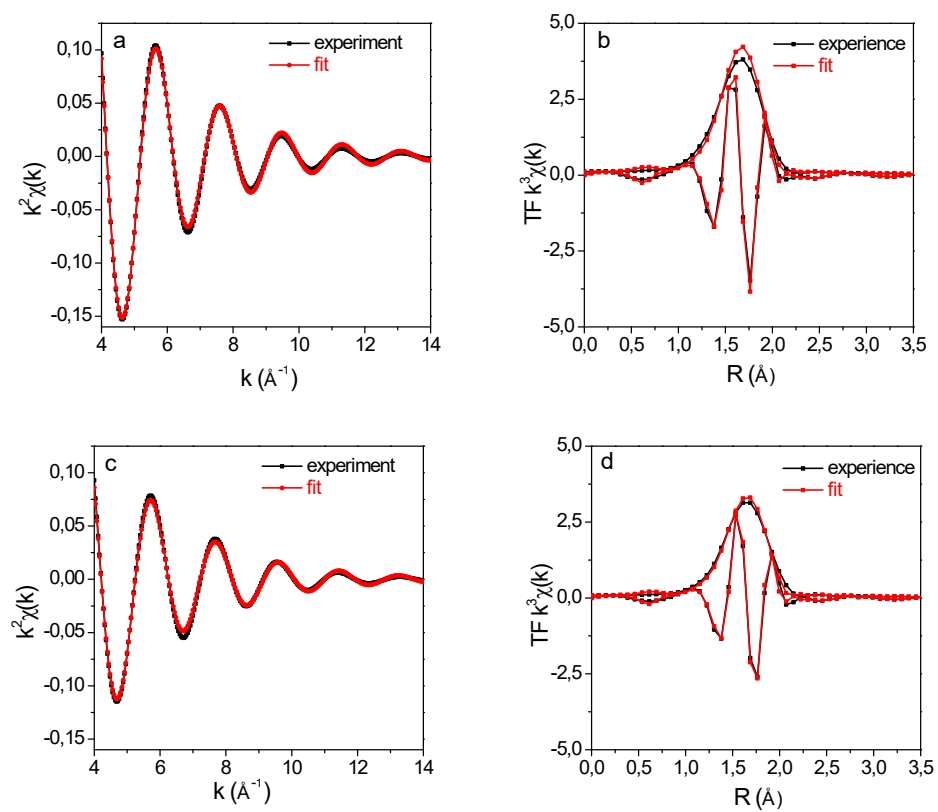

Figure SI4. XANES spectra (A), EXAFS signals (B) and related modulus of the Fourier Transform of the  $k^2$ -weighted EXAFS signals (C) of the Ir-NC recorded at room temperature for the following states: initial (under air), initial under flow of  $H_2/He$ , after pre-treatment under  $H_2/He$  at 250 °C and after reaction at 200 °C. Examples of EXAFS fittings (D and E).

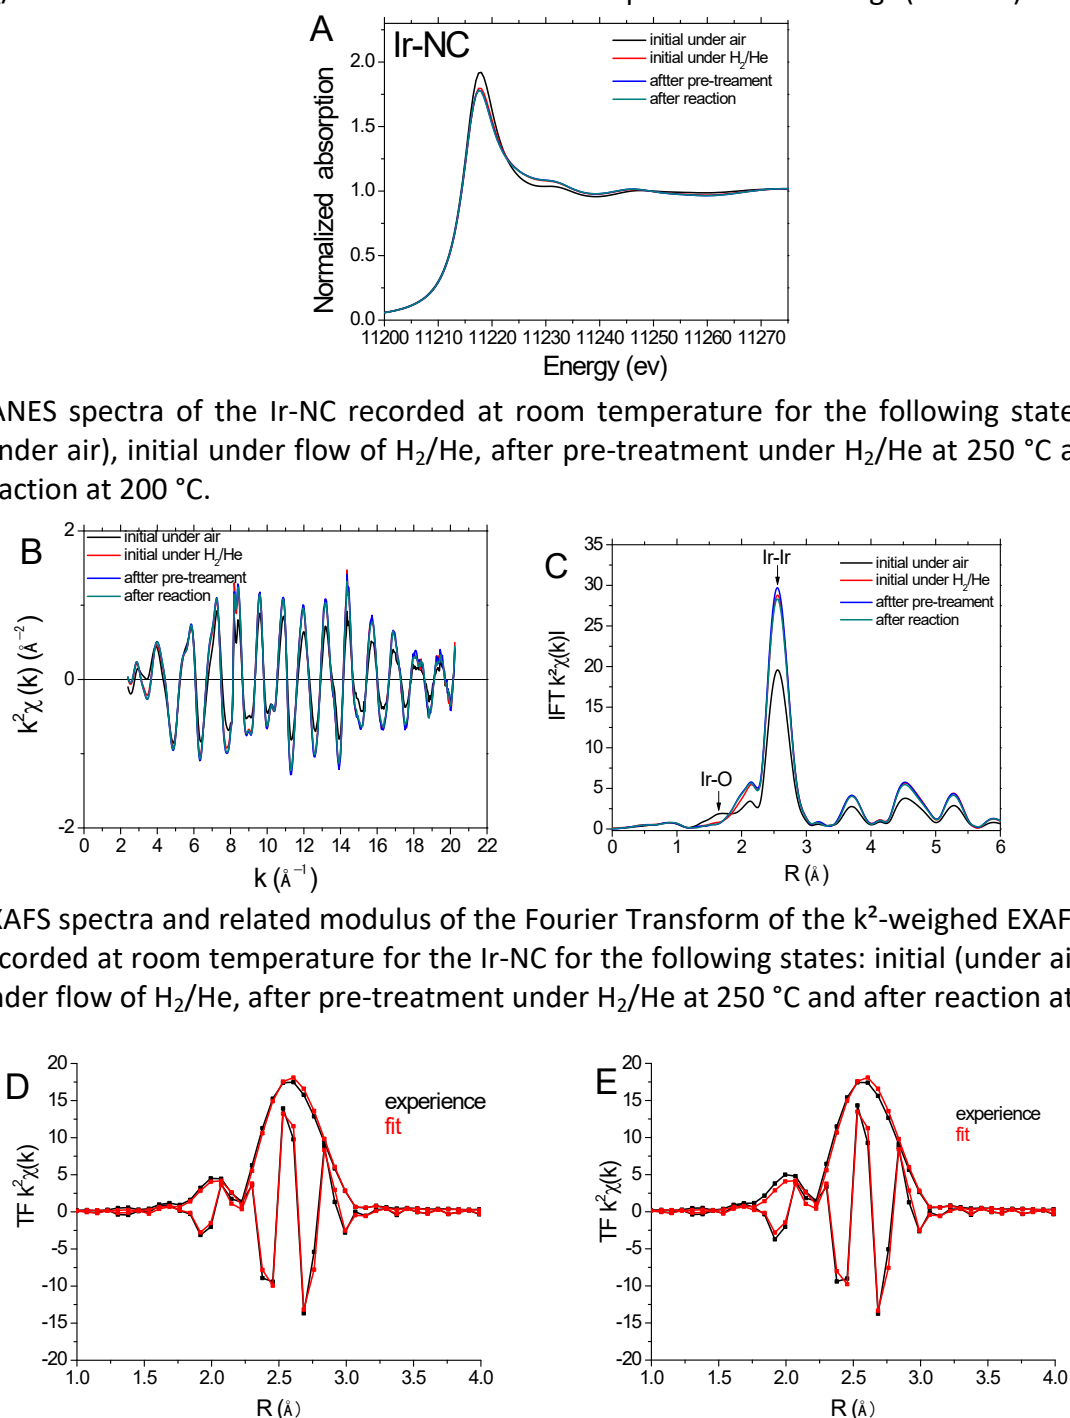

Examples of EXAFS fitting for Ir-NC initial under flow of  $H_2/He$  at room temperature (D) and after reaction at room temperature (E).

Figure SI5. Mass spectrometry monitoring of hydrocarbon reactant and products during the hydrogenation of butadiene on Ir-SAC and Ir-NC.

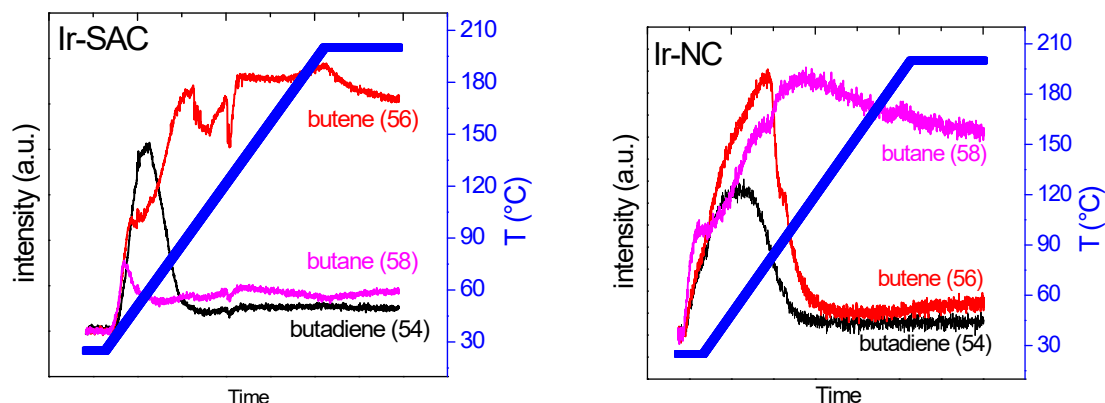

The gaseous product distributions during reaction of both Ir-SAC and Ir-NC were detected by mass spectrometry during XAS experiments. The peaks of the fragments from butadiene, butene and butane in MS spectrum range from  $m/z=15$  to  $m/z=59$  and their product pools are very similar. After a careful selection, the pristine  $m/z=54$ ,  $m/z=56$  and  $m/z=58$  signals were chosen to represent butadiene, butenes and butane during reaction, respectively, although they are not the principal peaks in the mass spectrometry standard data (<https://webbook.nist.gov>).

Ir-SAC was highly active and selective to butenes while butane was the principal product for Ir-NC. The result is consistent with laboratory catalytic tests, confirming that *operando* XAS experiments were conducted in the same conditions.

Figure SI6. Ex situ STEM-HAADF images of Ir-SAC as-prepared (A), after treatment under  $\text{H}_2/\text{Ar}$  flow at 250 °C (B) and 400 °C (C).

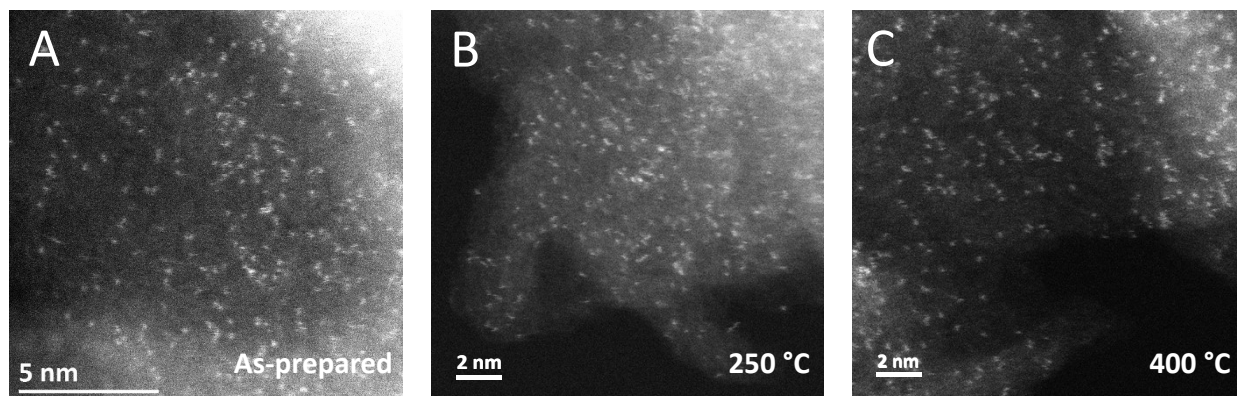

Supplement: d2nr00994c1.pdf [file d2nr00994c1.pdf]
